# Supplementary material for: A study paradigm integrating prospective epidemiologic cohorts and electronic health records to identify disease biomarkers
Source: PubMed Central journal article supplement (PMC6117367; doi:10.1038/s41467-018-05624-4), 2018-08-30
Supplement: 41467_2018_5624_MOESM1_ESM.pdf [file 41467_2018_5624_MOESM1_ESM.pdf]

## **Description of Additional Supplementary Files**

File Name: Supplementary Data 1

Description: List of all pheWAS associations with Bonferroni  $p < 0.05$ .

File Name: Supplementary Data 2

Description: List of all pheWAS associations with FDR  $q < 0.1$ .

File Name: Supplementary Data 3

Description: Skewness values for the PheWAS association statistics for each ARIC biomarker phenotype.

File Name: Supplementary Data 4

Description: ARIC biomarker phenotypes used in the analyses.
