# Supplementary material for: A study paradigm integrating prospective epidemiologic cohorts and electronic health records to identify disease biomarkers
Source: PubMed Central journal article supplement (PMC6117367; doi:10.1038/s41467-018-05624-4), 2018-08-30
Supplement: 41467_2018_5624_MOESM3_ESM.pdf [file 41467_2018_5624_MOESM3_ESM.pdf]

# Supplementary Information

**A study paradigm integrating prospective epidemiologic cohorts and electronic health records to identify disease biomarkers**

Mosley et al.

# Supplementary Figure 1

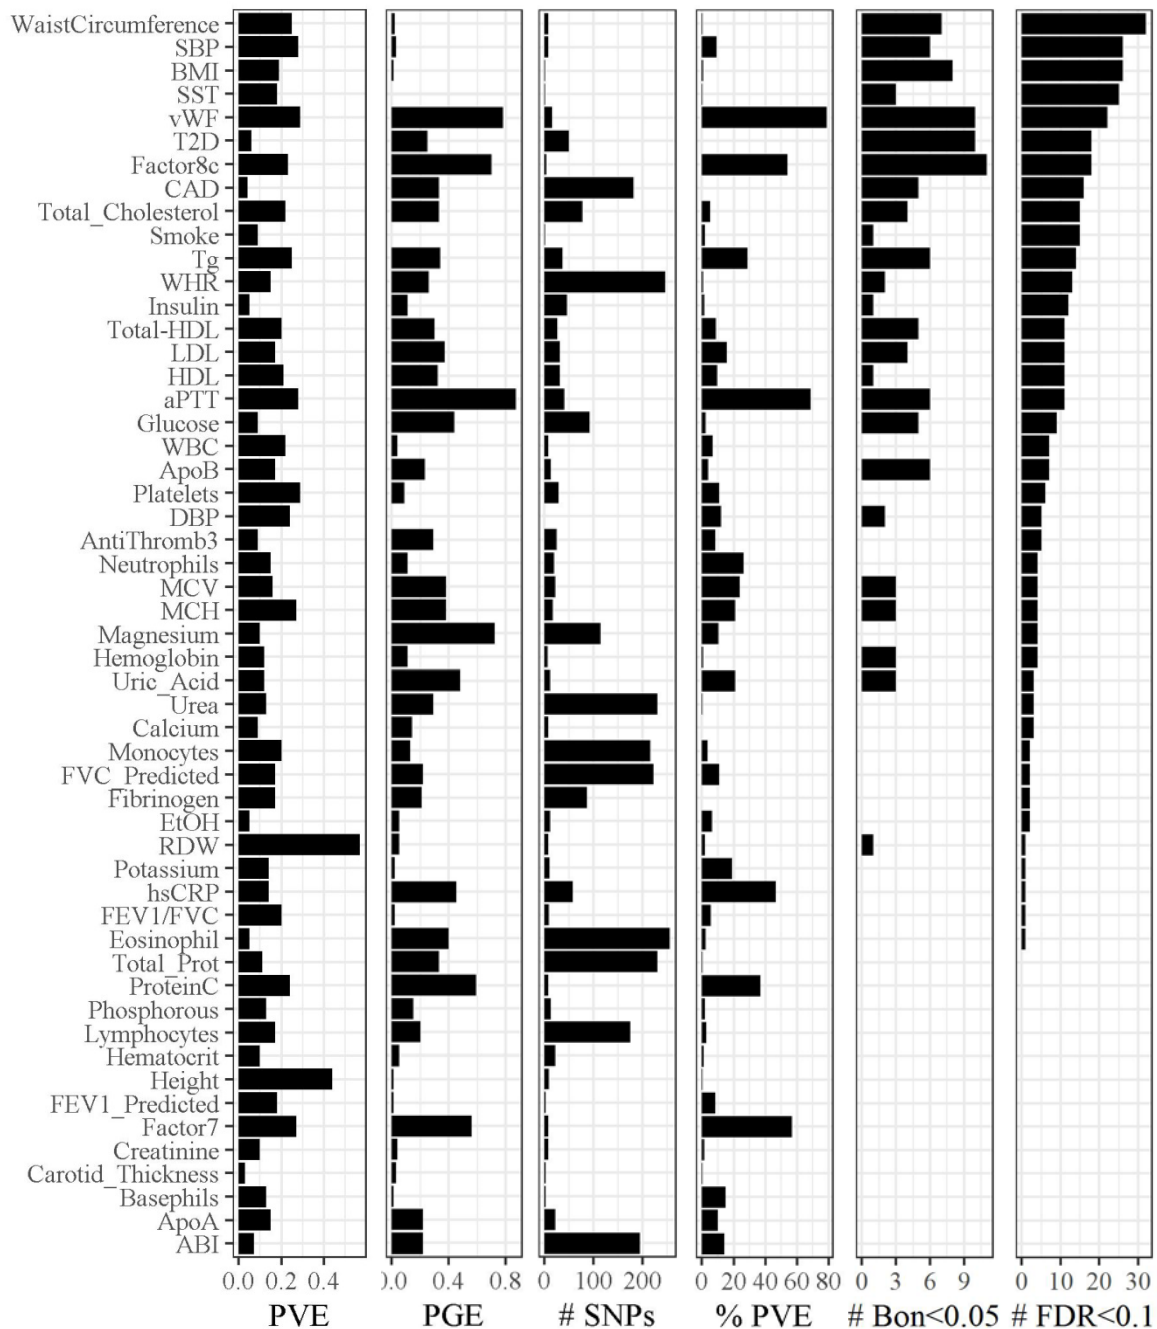

**Supplementary Figure 1: Summary of BSLMM analyses on the 53 ARIC biomarkers.** For each biomarker, the histograms show the estimate of the proportion of phenotypic variance explained (PVE), the proportion of genetic variance explained by SNPs with large effects (PGE), the estimated number of large-effect SNPs modulating the biomarker (# SNPs), the proportion of the PVE explained by the genetic predictor of the biomarker level (% PVE), the number of PheWAS association with Bonferroni  $p < 0.05$  and the number of associations with FDR  $q < 0.1$ . An asterisk (\*) indicates the %PVE was not determined (for binary phenotypes). Biomarkers are sorted by the number of associations with FDR  $q < 0.1$  with the PheWAS phenotypes (shown in the last column).

# Supplementary Figure 2 (part 1)

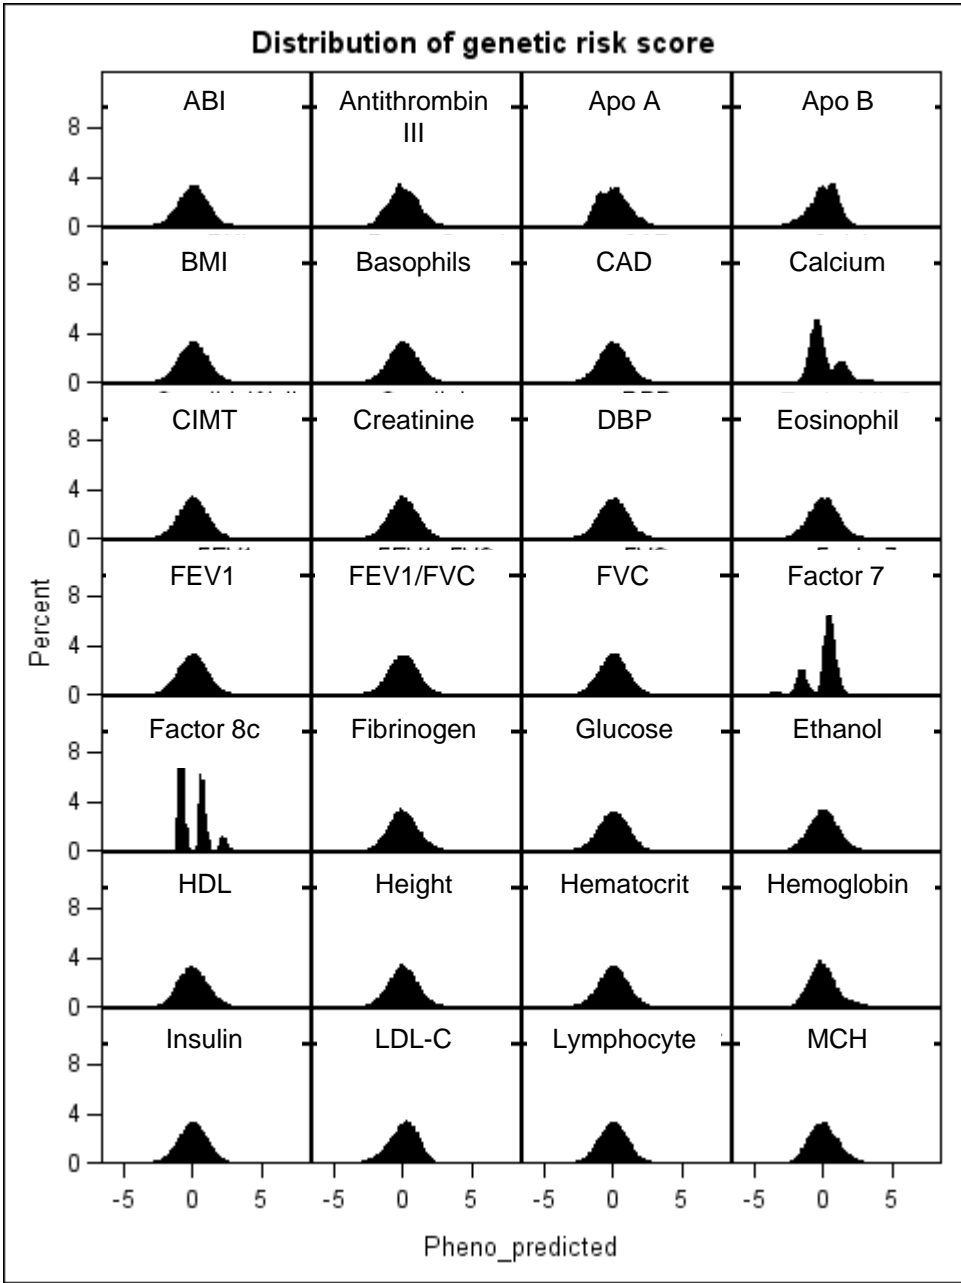

Figure and legend continued on next page.

# Supplementary Figure 2 (part 2)

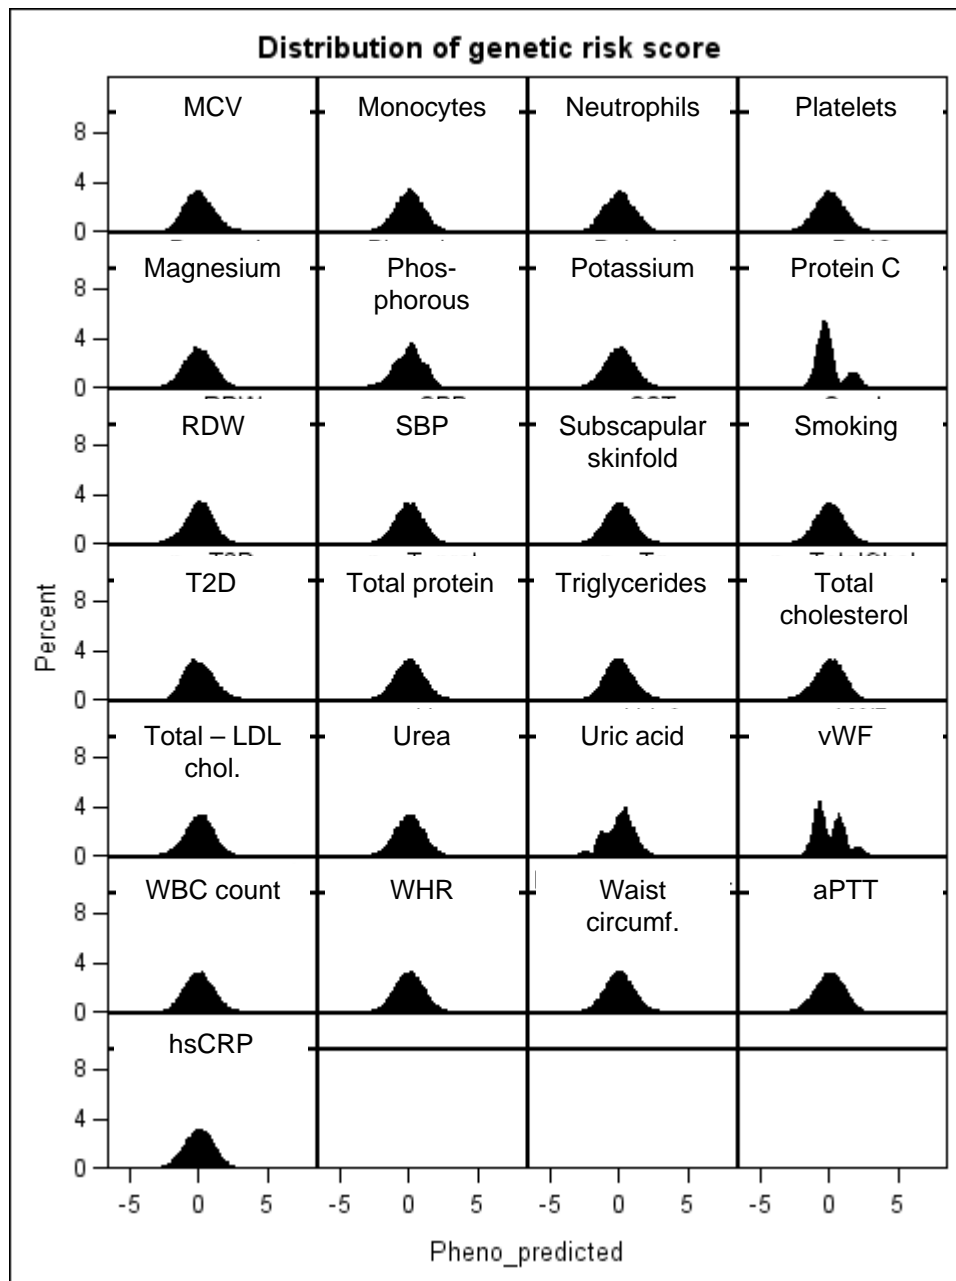

**Supplementary Figure 2: Frequency distributions for each of the 53 genetically predicted ARIC biomarkers in the EHR population.** Each panel represents the distribution for a genetically predicted biomarker within the EHR population. Genetically predicted biomarkers were computed using SNP weights estimated from BSLMM analyses of each ARIC biomarker. The x-axis units are standard deviations from the mean.

# Supplementary Figure 3

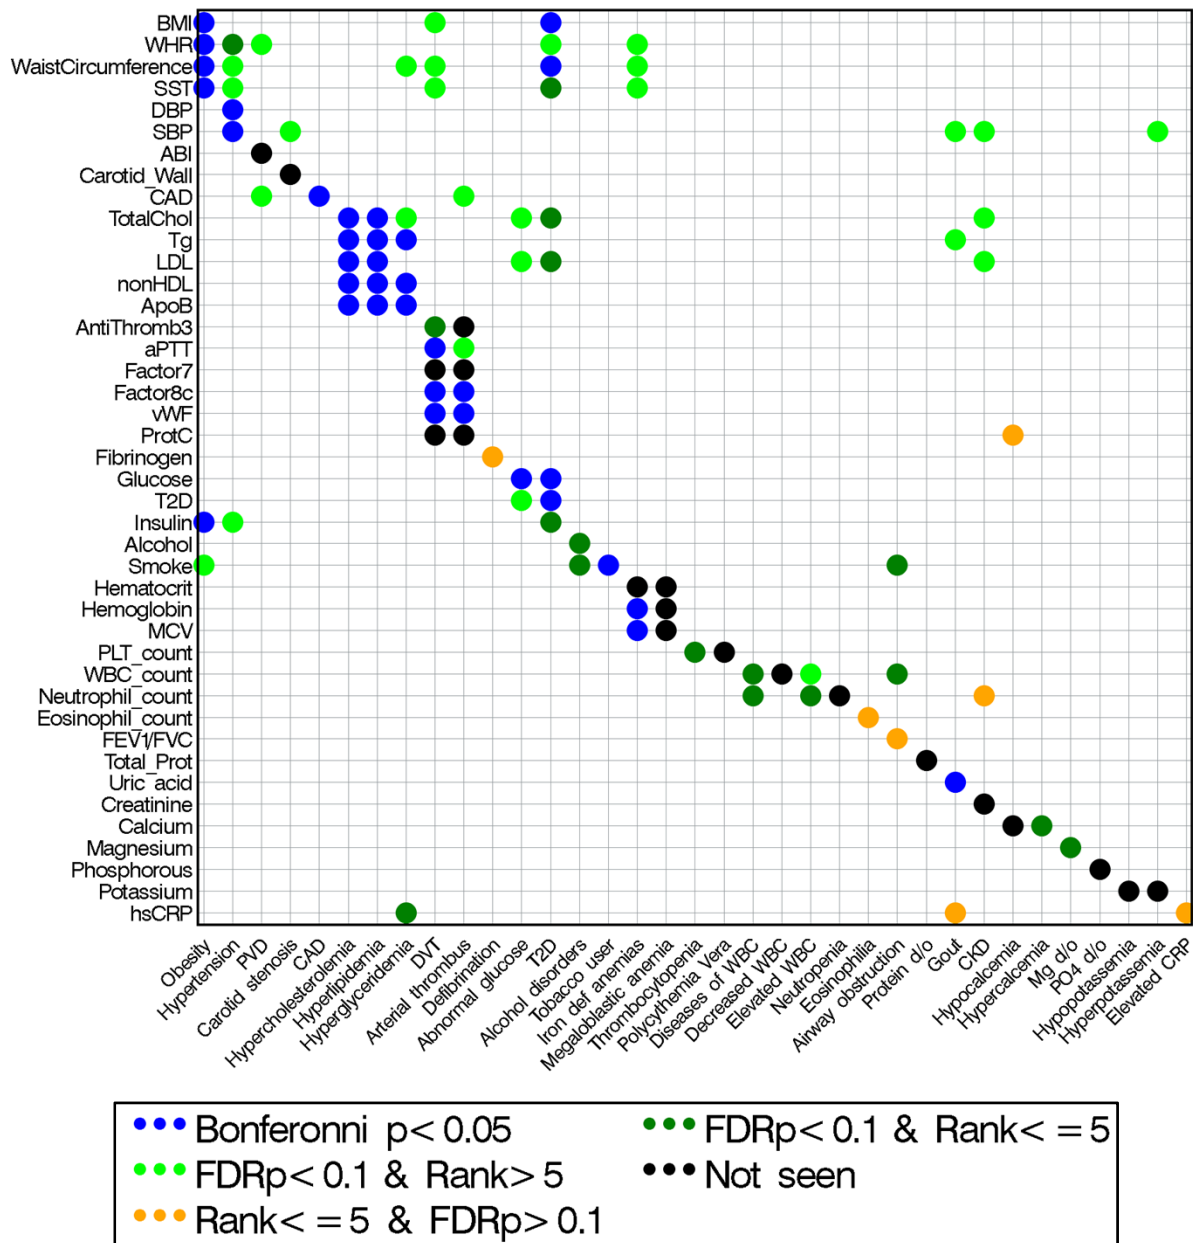

**Supplementary Figure 3 Associations with positive controls.** Positive control phenotypes were identified *a priori* for 42 ARIC biomarkers. The scatter plot shows associations between the positive control phenotypes (x-axis) and the 42 genetically predicted biomarkers (y-axis). Colors denote whether the significance of the association meets Bonferroni p-value, FDR p-value threshold and rank order criteria. A black dot denotes positive control pairs where an expected association met none of the association criterion.

# Supplementary Figure 4

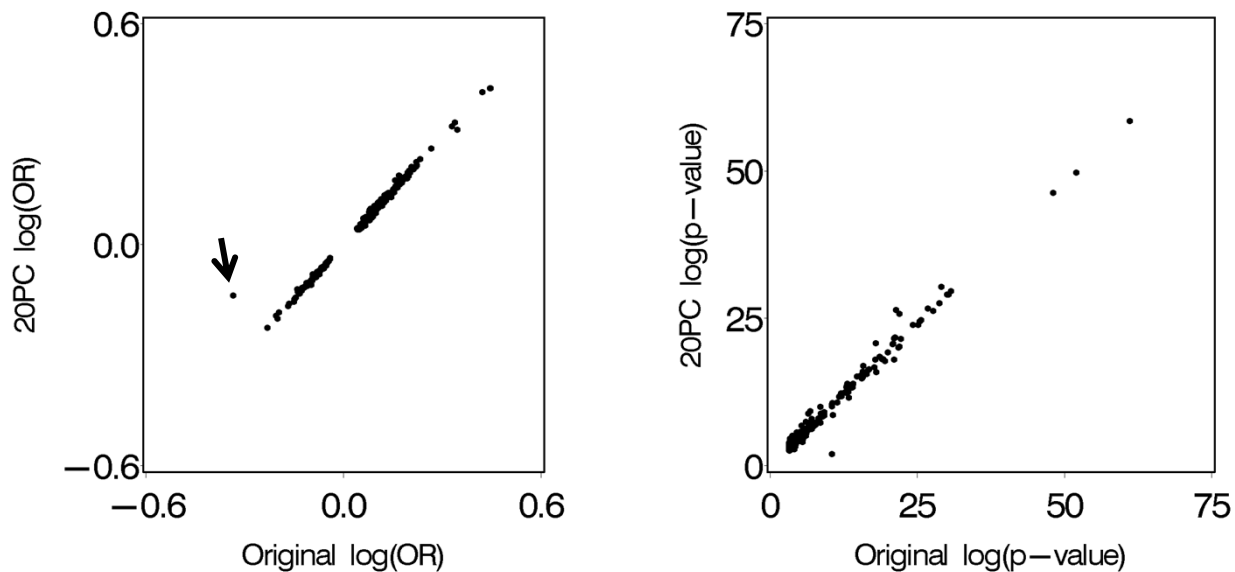

**Supplementary Figure 4: Comparison with adjusting for 20 PCs.** The scatter plots compare log(odd-ratio) [left panel] and log(p-value) [right panel] for associations with FDR  $q < 0.1$  in the primary results to results obtained when adjusting both the BSLMM and logistic regression models for 20 PCs. The arrow points to an outlying association between the “red blood cell distribution width (RDW)” biomarker and the phenotype “Disorders of iron metabolism”.

# Supplementary Figure 5

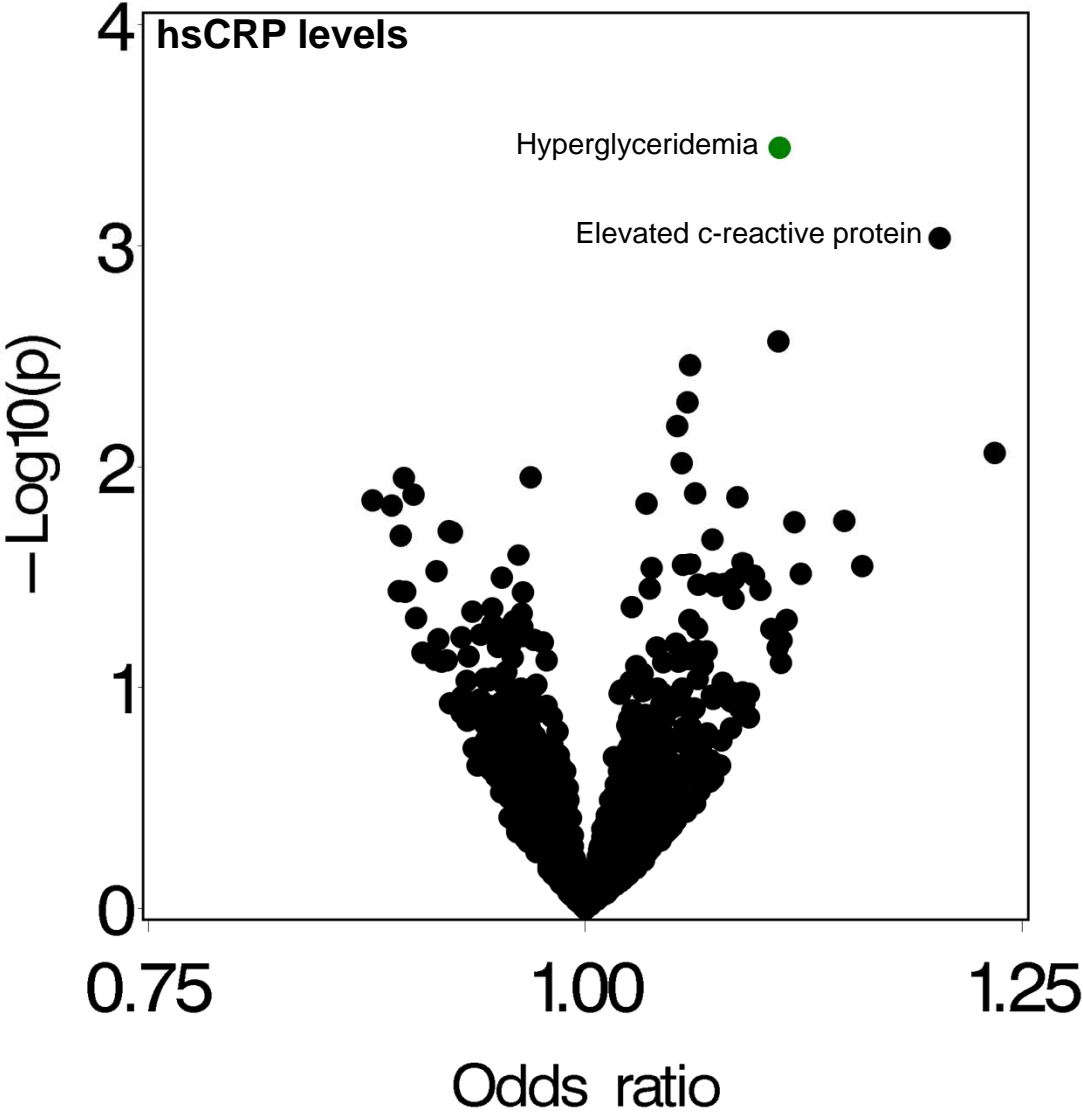

**Supplementary Figure 5: Associations with hsCRP.** The scatter plot summarizes pheWAS analyses for a genetic predictor of high sensitivity C-reactive protein (hsCRP). Odds ratios are from logistic regression analyses, adjusting for birth decade, gender and 3 principal components, and represent the risk associated with a 1 standard deviation change in the value of the genetic predictor. Points highlighted in green are significant at FDR  $q < 0.1$ .

# Supplementary Figure 6

## ARIC Biomarkers

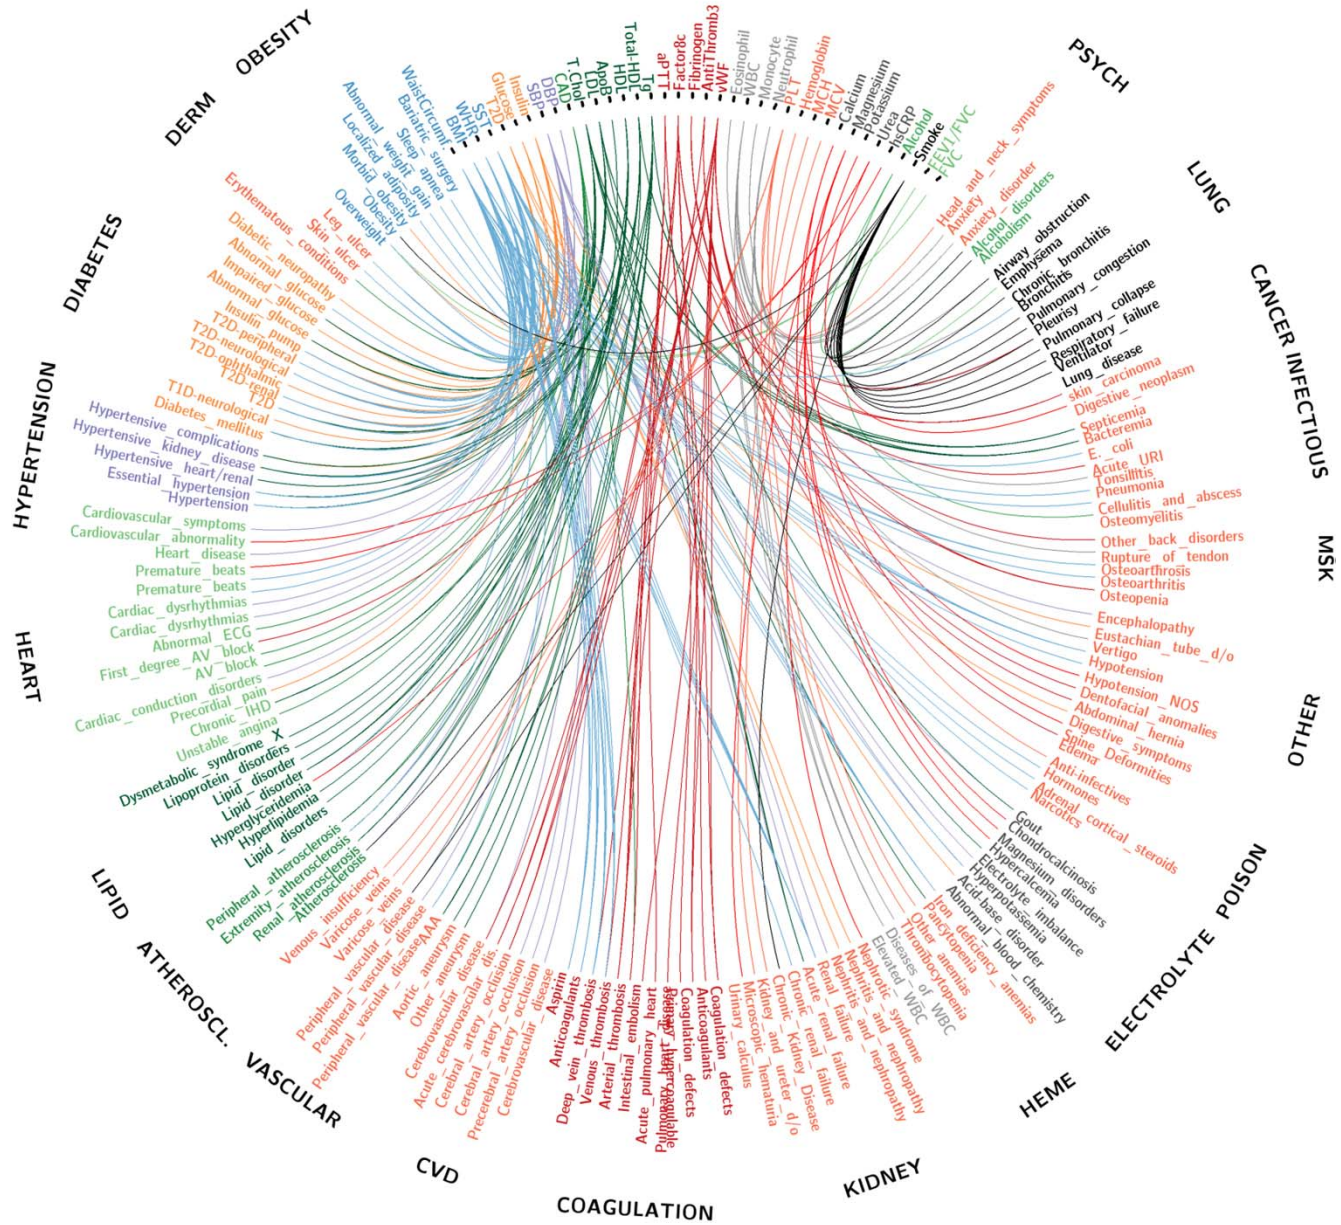

**Supplementary Figure 6: Associations with FDR  $p < 0.1$  and Bonferroni  $p \geq 0.05$ .** Circos plot showing 261 associations between the genetic predictors of the ARIC biomarkers and pheWAS phenotypes. Associations are denoted by lines. Coloring is used to highlight similar groups of biomarkers and pheWAS phenotypes.



# Supplementary Figure 7

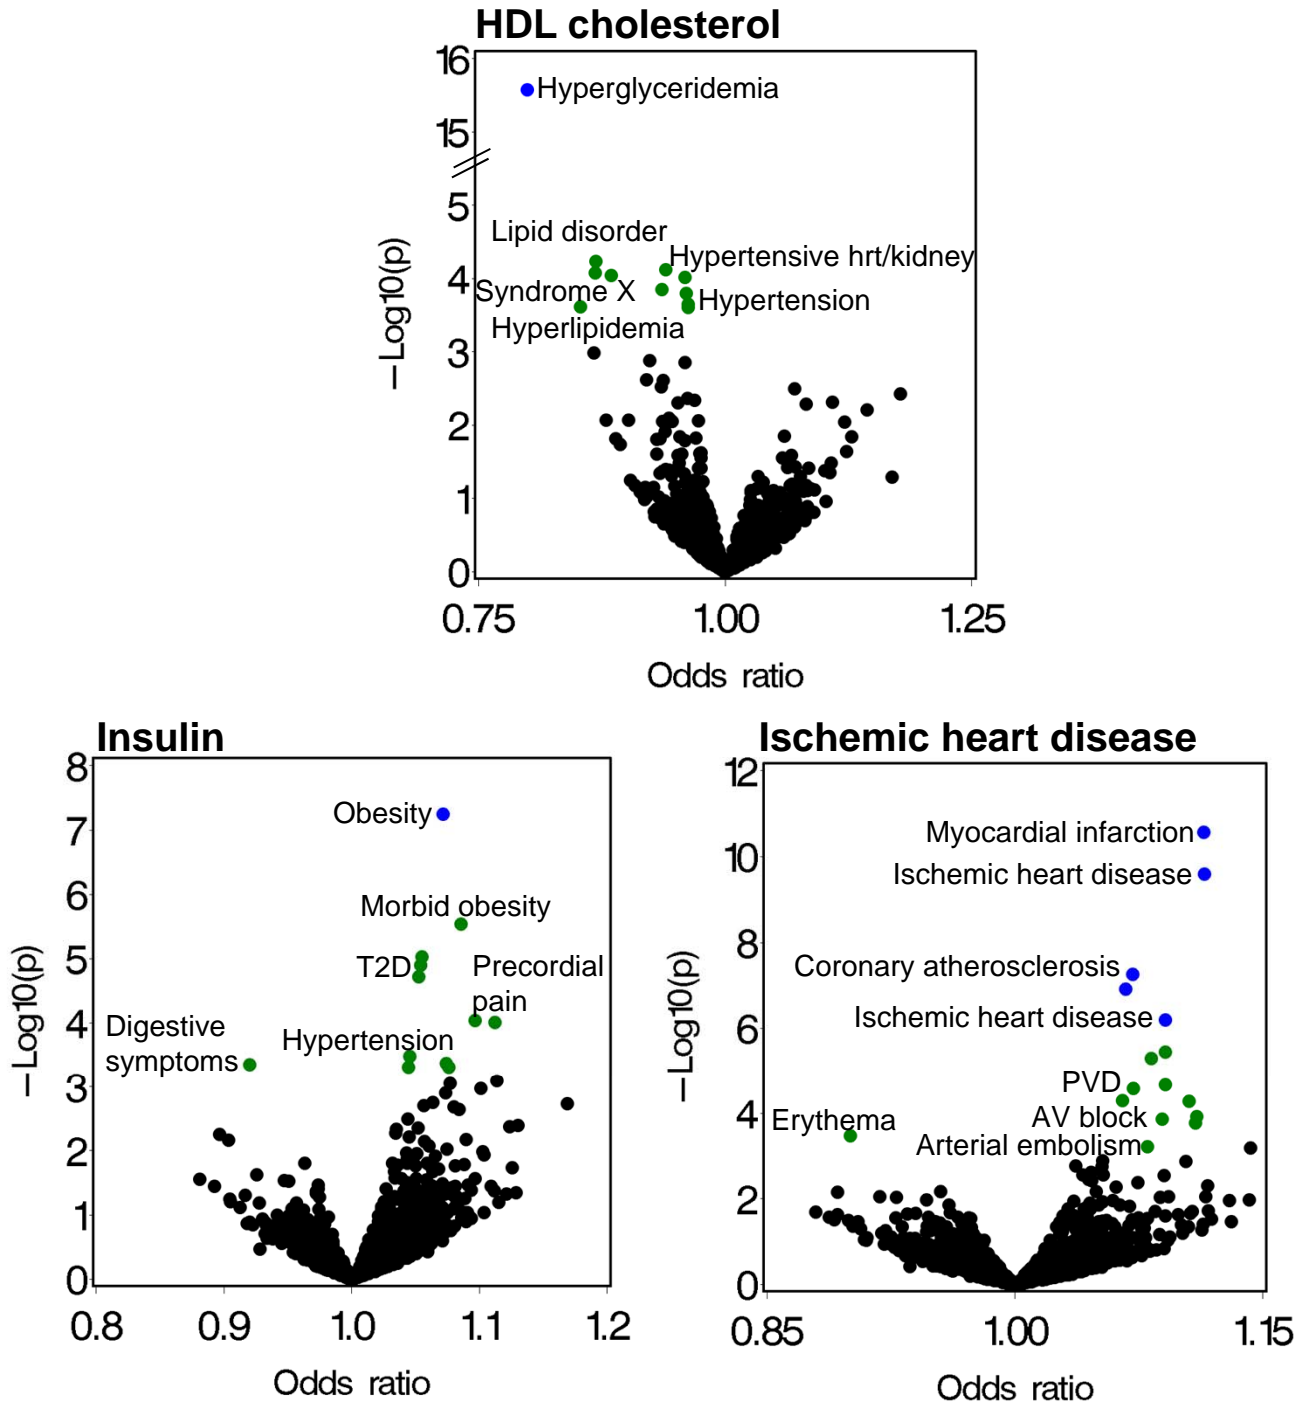

**Supplementary Figure 7: Associations with metabolic biomarkers.** The scatter plots summarize PheWAS analyses for genetic predictors of ARIC biomarkers. Odds ratios are from logistic regression analyses, adjusting for birth decade, gender and 3 principal components, and represent the risk associated with a 1 standard deviation change in the value of the genetic predictor. Points highlighted in blue and green are significant at Bonferroni  $p < 0.05$  and FDR  $q < 0.1$ , respectively. PVD=peripheral vascular disease; IHD=ischemic (coronary) heart disease; T2D= type 2 diabetes.

# Supplementary Figure 8

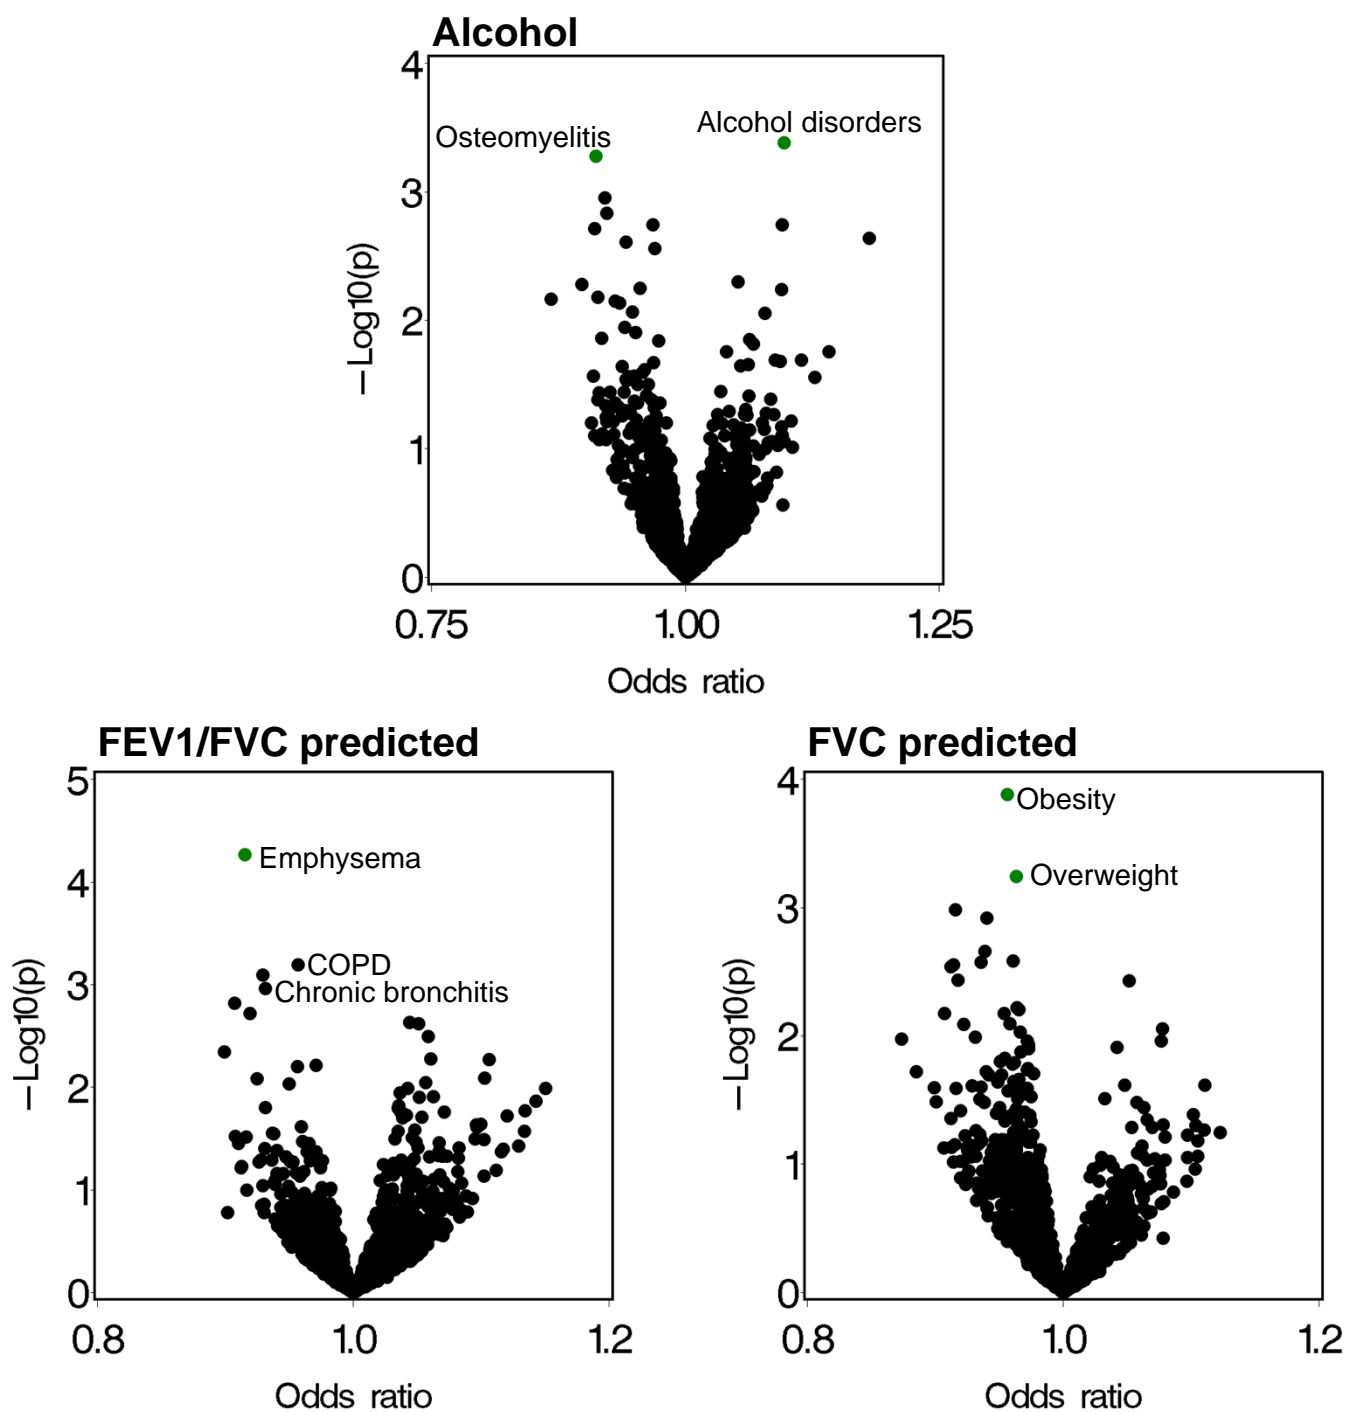

## Supplementary Figure 8: Associations with alcohol and pulmonary function biomarkers.

The scatter plots summarize pheWAS analyses for genetic predictors of ARIC biomarkers. Odds ratios are from logistic regression analyses, adjusting for birth decade, gender and 3 principal components, and represent the risk associated with a 1 standard deviation change in the value of the genetic predictor. Points highlighted in green are significant at FDR  $q < 0.1$ . FEV1=forced expiratory volume, 1 second; FVC=forced vital capacity, COPD=chronic obstructive pulmonary disease.

# Supplementary Figure 9

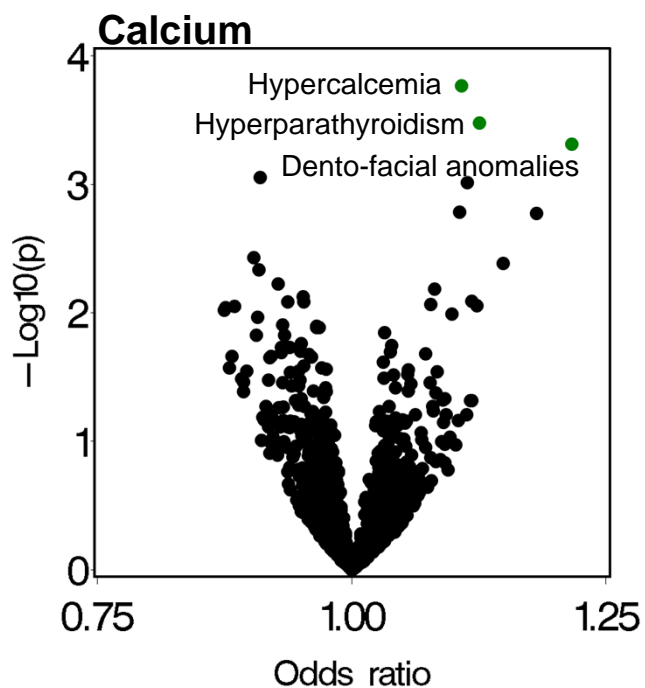

**Supplementary Figure 9: Associations with serum calcium.** The scatter plot summarizes PheWAS analyses for genetic predictors of ARIC biomarkers. Odds ratios are from logistic regression analyses, adjusting for birth decade, gender and 3 principal components, and represent the risk associated with a 1 standard deviation change in the value of the genetic predictor. Points highlighted in green are significant at FDR  $q < 0.1$ .

# Supplementary Figure 10

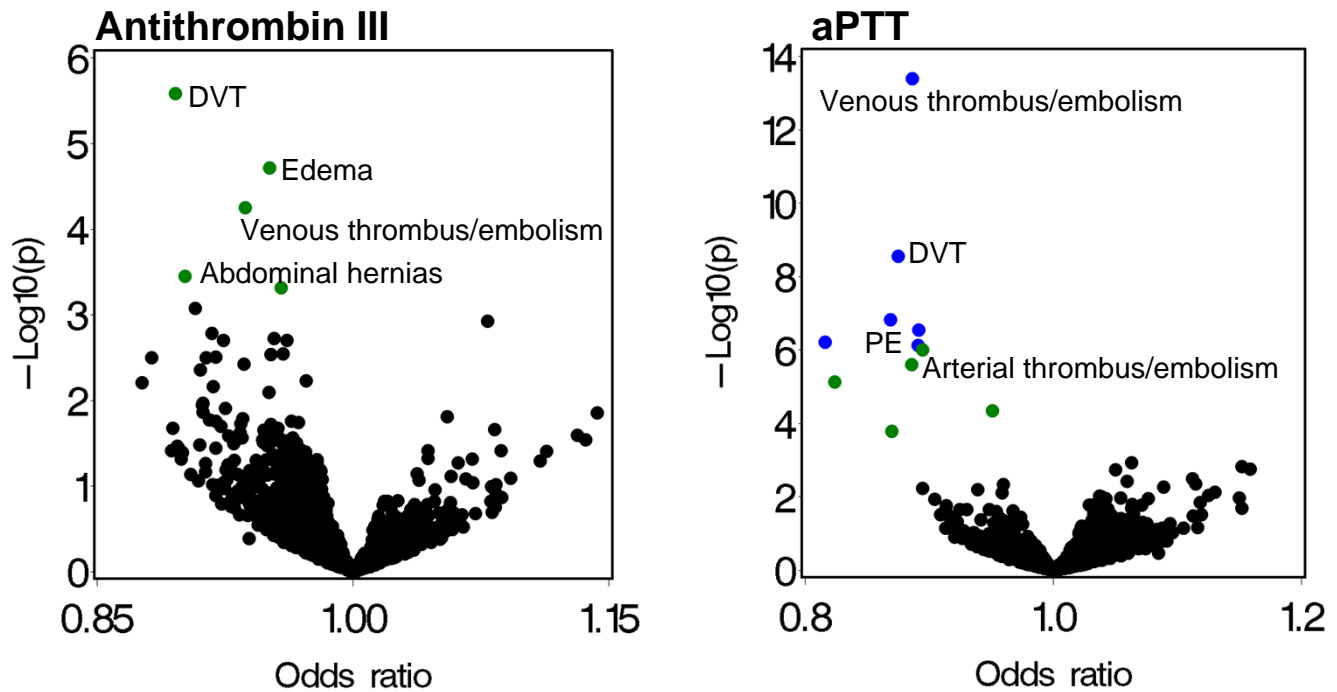

**Supplementary Figure 10: Associations with coagulation biomarkers.** The scatter plots summarize pheWAS analyses for genetic predictors of ARIC biomarkers. Odds ratios are from logistic regression analyses, adjusting for birth decade, gender and 3 principal components, and represent the risk associated with a 1 standard deviation change in the value of the genetic predictor. Points highlighted in blue and green are significant at Bonferroni  $p < 0.05$  and FDR  $q < 0.1$ , respectively. DVT=deep vein thrombosis; PE=pulmonary embolism.

# Supplementary Figure 11

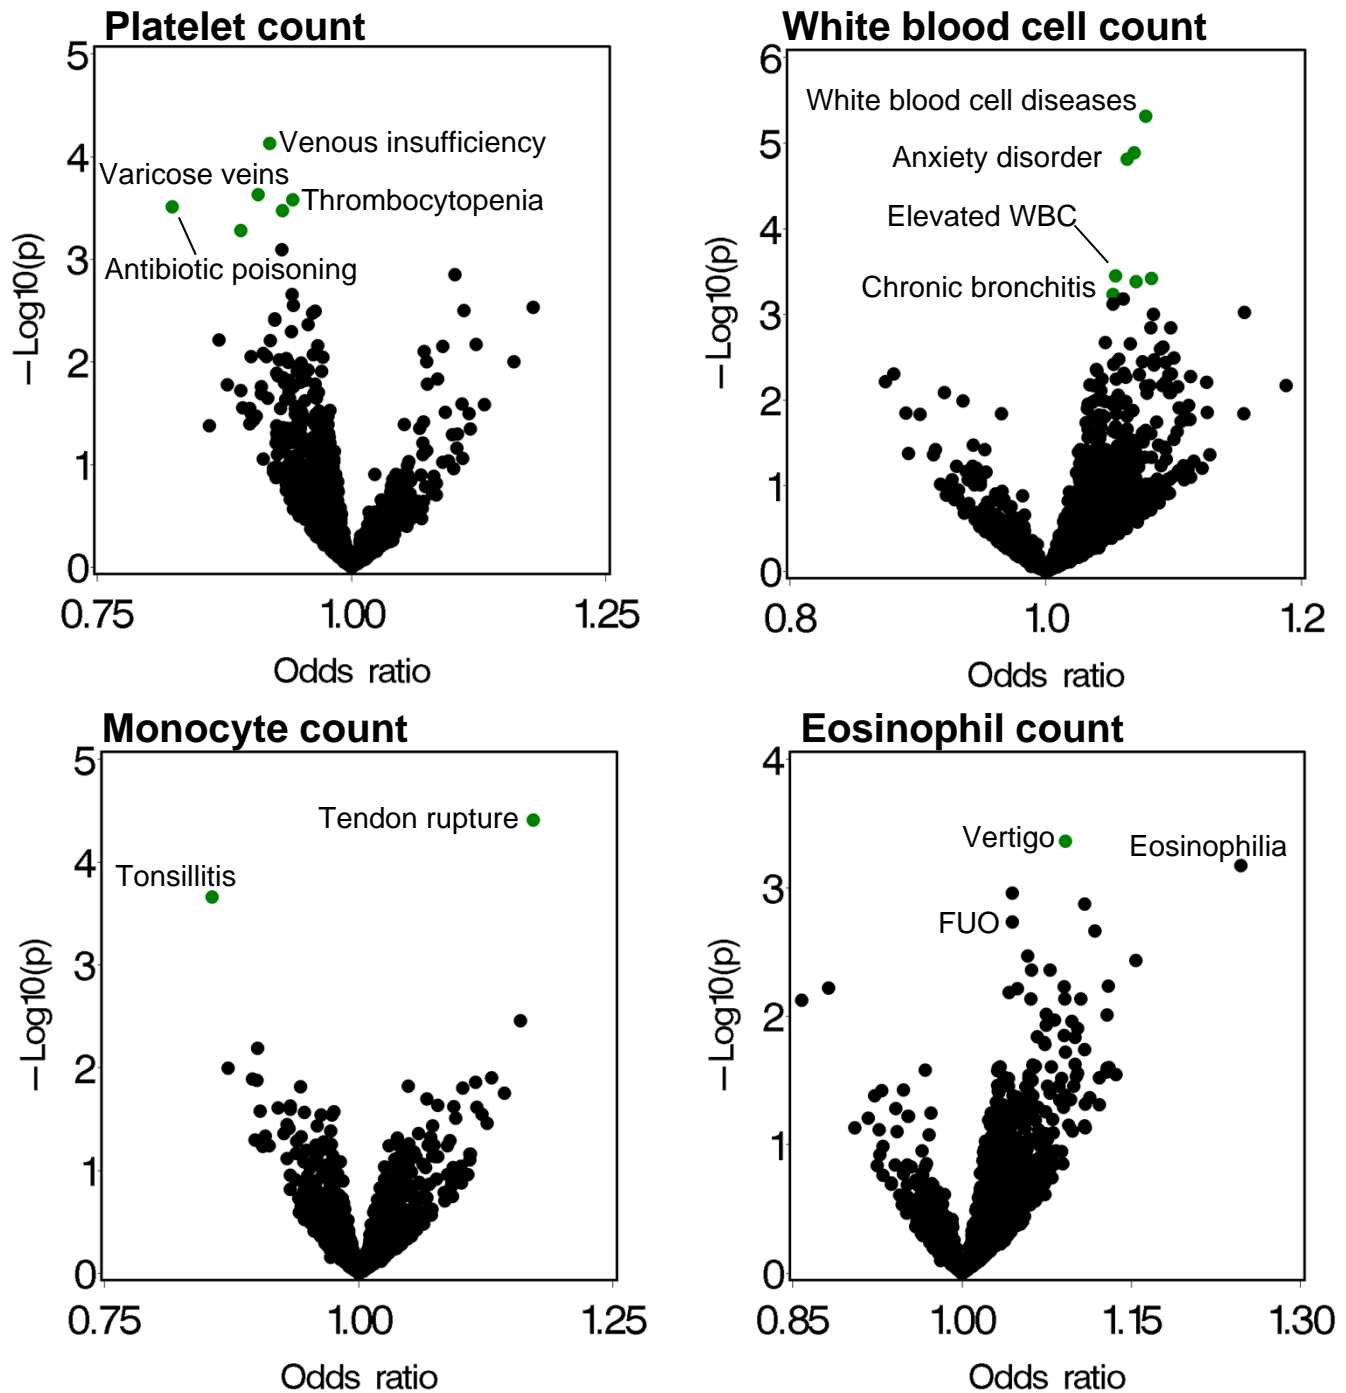

**Supplementary Figure 11: Associations with hematological biomarkers.** The scatter plots summarize pheWAS analyses for genetic predictors of ARIC biomarkers. Odds ratios are from logistic regression analyses, adjusting for birth decade, gender and 3 principal components, and represent the risk associated with a 1 standard deviation change in the value of the genetic predictor. Points highlighted in green are significant at FDR  $q < 0.1$ . WBC=white blood cell; FOU=Fever of unknown origin.

# Supplementary Figure 12

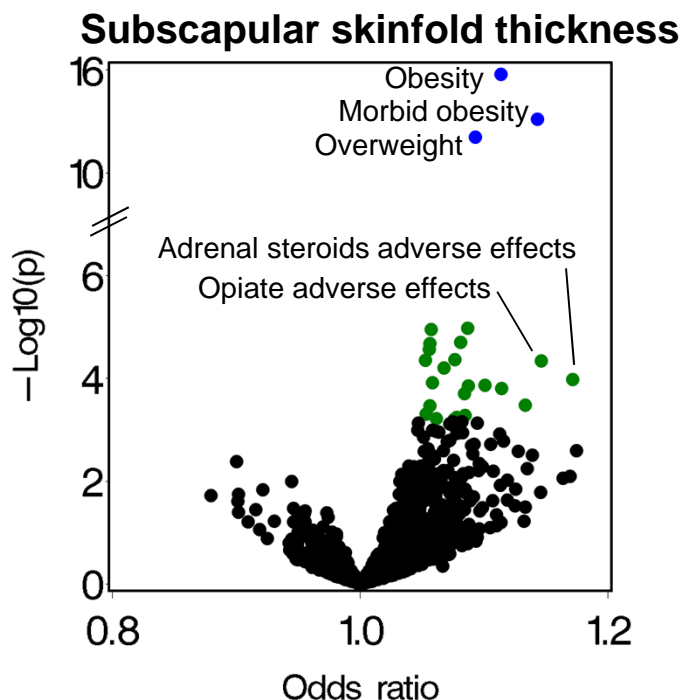

**Supplementary Figure 12: Associations with subscapular skinfold thickness.** The scatter plots summarize PheWAS analyses for genetic predictors of ARIC phenotypes. Odds ratios are from logistic regression analyses, adjusting for birth decade, gender and 3 principal components, and represent the risk associated with a 1 standard deviation change in the value of the genetic predictor. Points highlighted in blue and green are significant at Bonferroni  $p < 0.05$  and FDR  $q < 0.1$ , respectively.

# Supplementary Figure 13

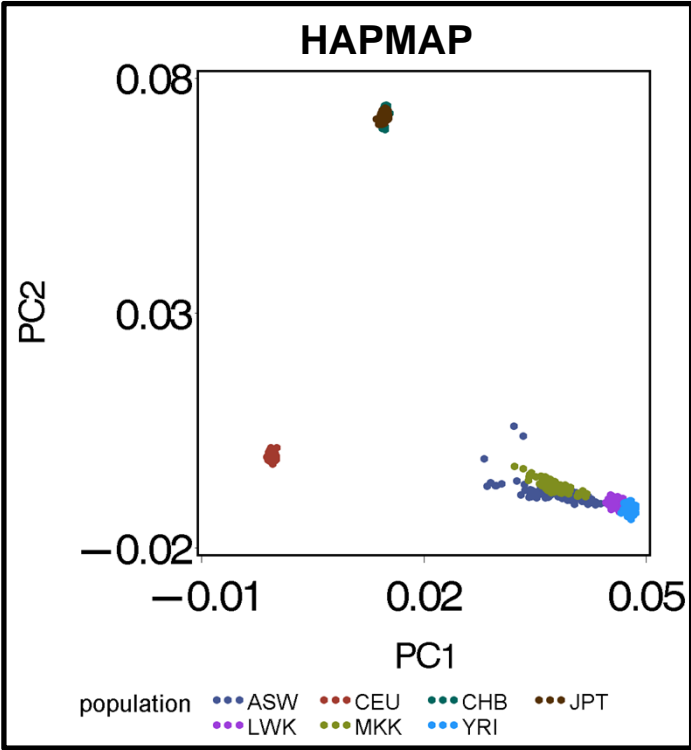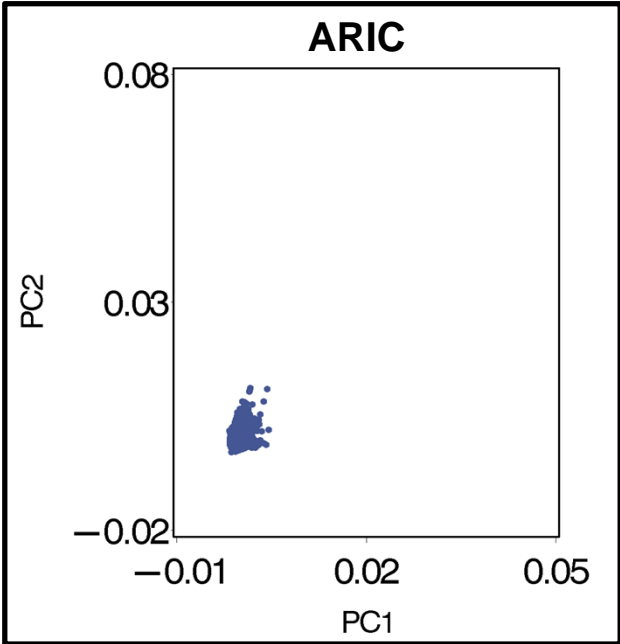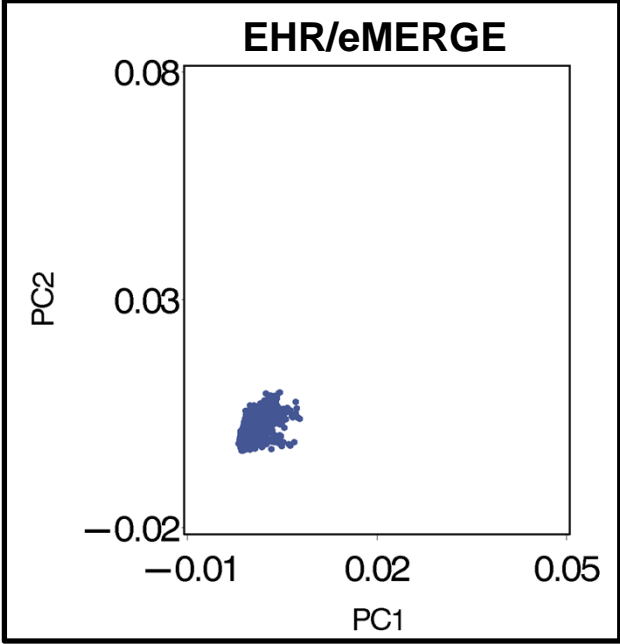

**Supplementary Figure 13: Visualization of the ARIC and EHR populations by principal components.** The scatter plots of PC1 and PC2 for HAPMAP references populations, the ARIC population and the EHR population.

**Supplementary Table 1: Characteristics of the ARIC population.**

| <b>Characteristic</b>                                            | <b>Value</b> |
|------------------------------------------------------------------|--------------|
| <b>Sex [n (%)]</b>                                               |              |
| Males                                                            | 3,649 (47.1) |
| Females                                                          | 4,091 (52.9) |
|                                                                  |              |
| <b>Age at first visit (years)</b>                                |              |
| median (IQR)                                                     | 54 (49-59)   |
|                                                                  |              |
| <b>Biomarker phenotypes [Mean (s.d)]</b>                         |              |
| Alcohol intake                                                   | 1.2 (1.6)    |
| Ankle-brachial index (ABI)                                       | 1.1 (0.1)    |
| Anti-thrombin III                                                | 110.1 (20.9) |
| Apolipoprotein A                                                 | 7.2 (0.2)    |
| Apolipoprotein B                                                 | 6.8 (0.3)    |
| Basophil count                                                   | 0.6 (1.2)    |
| Blood urea nitrogen                                              | 2.7 (0.2)    |
| Body mass index (BMI)                                            | 26.8 (4.6)   |
| Carotid intima-medial thickness (CIMT),<br>Average L bifurcation | -0.2 (0.3)   |
| Coronary heart disease                                           | 1,325 cases  |
| Diastolic blood pressure (DBP)                                   | 0.1 (8.9)    |
| Eosinophil count                                                 | 2.7 (0.6)    |
| Factor VII level                                                 | 4.7 (0.2)    |
| Factor VIIIc level                                               | 4.8 (0.3)    |
| FEV1/FVC, predicted                                              | 0.9 (0.1)    |
| Fibrinogen level                                                 | 5.7 (0.2)    |
| Forced expiratory volume 1s (FEV1)                               | 0.9 (0.2)    |
| Forced vital capacity (FVC)                                      | 1.0 (0.1)    |
| Height                                                           | 168.9 (9.5)  |
| Hematocrit level                                                 | 42.2 (3.7)   |
| Hemoglobin level                                                 | 14.1 (1.3)   |
| High density lipoprotein (HDL)<br>cholesterol                    | 0.2 (0.3)    |
| High sensitivity c-reactive protein (hsCRP)                      | 0.8 (1.1)    |
| Low density lipoprotein (LDL) cholesterol                        | 3.5 (0.9)    |
| Lymphocyte count                                                 | 5.2 (0.3)    |
| Mean cellular hemoglobin (MCH)                                   | 31.1 (1.6)   |
| Mean corpuscular volume (MCV)                                    | 90.7 (4.1)   |
| Monocyte count                                                   | 3.5 (0.5)    |
| Neutrophil count                                                 | 5.9 (0.4)    |
| Non-HDL cholesterol                                              | 4.2 (1.1)    |
| Partial thromboplastin time (aPTT)                               | 3.4 (0.1)    |



|                                |               |
|--------------------------------|---------------|
| Platelet count                 | 5.5 (0.2)     |
| RBC distribution width (RDW)   | 1.1 (0.0)     |
| Serum calcium                  | 9.8 (0.4)     |
| Serum creatinine               | 0.1 (0.2)     |
| Serum Glucose                  | 1.7 (0.1)     |
| Serum Insulin                  | 4.1 (0.7)     |
| Serum Magnesium                | 1.7 (0.1)     |
| Serum phosphorous              | 3.4 (0.5)     |
| Serum Potassium                | 4.5 (0.5)     |
| Serum protein C                | 3.2 (0.6)     |
| Serum triglycerides (Tg)       | 0.3 (0.5)     |
| Serum uric acid                | 5.9 (1.5)     |
| Smoking                        | 343.9 (438.0) |
| Subscapular skinfold thickness | 21.8 (9.3)    |
| Systolic blood pressure (SBP)  | 0.0 (16.4)    |
| Total cholesterol              | 5.5 (1.0)     |
| Total protein                  | 7.2 (0.4)     |
| Type 2 diabetes (T2D)          | 1,335 cases   |
| Von Willebrand factor (vWF)    | 111.5 (42.8)  |
| Waist circumference            | 95.3 (13.5)   |
| Waist-hip ratio (WHR)          | 0.9 (0.1)     |
| White blood cell count         | 1.8 (0.3)     |

**Supplementary Table 2: Positive control pairs.**

For each biomarker phenotype, 1 or more pheWAS codes closely related to the phenotype were identified, prior to performing the pheWAS analysis. The pairings were classified as either "Disease defining" or "Biomarker", as indicated in the Methods. The rank is the position of the phenotype on the list of pheWAS associations that has been sorted by p-value (for instance, a rank of 1 indicates that the phenotype was the most significant association [measured by p-value] for the pheWAS, and a rank of 6 indicates that the phenotype was the 6th most significant association). The categories are used to computed tallies based on either an FDR p-value threshold or a rank threshold.

| ARIC Biomarker                                                | Biomarker type   | Positive control pheWAS phenotype(s)                     | Phenotype rank | Bonferroni p-value | Rank category | FDR p-value |
|---------------------------------------------------------------|------------------|----------------------------------------------------------|----------------|--------------------|---------------|-------------|
| Ankle-brachial index (ABI)                                    | Biomarker        | PVD                                                      | 155            | >=0.05             | >5            | >=0.1       |
| Anti-thrombin III                                             | Biomarker        | DVT, Arterial thrombus                                   | 1              | >=0.05             | <=05          | <0.05       |
| Apolipoprotein B                                              | Biomarker        | Hyperlipidemia                                           | 2              | <0.05              | <=05          | <0.05       |
| Factor VII level                                              | Biomarker        | DVT, Arterial thrombus                                   | 296            | >=0.05             | >5            | >=0.1       |
| Factor VIIIc level                                            | Biomarker        | DVT, Arterial thrombus                                   | 2              | <0.05              | <=05          | <0.05       |
| FEV1/FVC, predicted                                           | Biomarker        | Chronic airway obstruction                               | 2              | >=0.05             | <=05          | >=0.1       |
| Fibrinogen level                                              | Biomarker        | Defibrination syndrome                                   | 5              | >=0.05             | <=05          | >=0.1       |
| Mean corpuscular volume (MCV)                                 | Biomarker        | Iron def anemias, Megaloblastic anemia                   | 3              | <0.05              | <=05          | <0.05       |
| Partial thromboplastin time (aPTT)                            | Biomarker        | DVT, Arterial thrombus                                   | 2              | <0.05              | <=05          | <0.05       |
| Serum creatinine                                              | Biomarker        | CKD                                                      | 65             | >=0.05             | >5            | >=0.1       |
| Serum Insulin                                                 | Biomarker        | T2D                                                      | 4              | >=0.05             | <=05          | <0.05       |
| Serum protein C                                               | Biomarker        | DVT, Arterial thrombus                                   | 114            | >=0.05             | >5            | >=0.1       |
| Serum uric acid                                               | Biomarker        | Gout                                                     | 1              | >=0.05             | <=05          | <0.05       |
| Subscapular skinfold thickness                                | Biomarker        | Obesity                                                  | 1              | <0.05              | <=05          | <0.05       |
| Von Willebrand factor (vWF)                                   | Biomarker        | DVT, Arterial thrombus                                   | 2              | <0.05              | <=05          | <0.05       |
| Waist circumference                                           | Biomarker        | Obesity                                                  | 2              | <0.05              | <=05          | <0.05       |
| Waist-hip ratio (WHR)                                         | Biomarker        | Obesity                                                  | 2              | <0.05              | <=05          | <0.05       |
| Alcohol intake                                                | Disease defining | Alcohol disorders                                        | 1              | >=0.05             | <=05          | <0.1        |
| Body mass index (BMI)                                         | Disease defining | Obesity                                                  | 1              | >=0.05             | <=05          | <0.05       |
| Carotid intima-medial thickness (CIMT), Average L bifurcation | Disease defining | Carotid stenosis                                         | 101            | >=0.05             | >5            | >=0.1       |
| Coronary heart disease                                        | Disease defining | CAD                                                      | 3              | <0.05              | <=05          | <0.05       |
| Diastolic blood pressure (DBP)                                | Disease defining | Essential hypertension                                   | 2              | <0.05              | <=05          | <0.05       |
| Eosinophil count                                              | Disease defining | Eosinophilia                                             | 2              | >=0.05             | <=05          | >=0.1       |
| Hematocrit level                                              | Disease defining | Iron def anemias, Megaloblastic anemia                   | 586            | >=0.05             | >5            | >=0.1       |
| Hemoglobin level                                              | Disease defining | Iron def anemias, Megaloblastic anemia                   | 3              | <0.05              | <=05          | <0.05       |
| High sensitivity c-reactive protein (hsCRP)                   | Disease defining | Elevated CRP                                             | 2              | >=0.05             | <=05          | >=0.1       |
| Low density lipoprotein (LDL) cholesterol                     | Disease defining | Hyperlipidemia                                           | 2              | <0.05              | <=05          | <0.05       |
| Neutrophil count                                              | Disease defining | Neutropenia                                              | 394            | >=0.05             | >5            | >=0.1       |
| Non-HDL cholesterol                                           | Disease defining | Hyperlipidemia                                           | 2              | <0.05              | <=05          | <0.05       |
| Platelet count                                                | Disease defining | Thrombocytopenia, Polycythemia Vera, secondary           | 3              | >=0.05             | <=05          | <0.1        |
| Serum calcium                                                 | Disease defining | Hypercalcemia, Hypocalcemia                              | 1              | >=0.05             | <=05          | <0.05       |
| Serum Glucose                                                 | Disease defining | Abnormal glucose                                         | 2              | <0.05              | <=05          | <0.05       |
| Serum Magnesium                                               | Disease defining | Mg disorders                                             | 1              | >=0.05             | <=05          | <0.05       |
| Serum phosphorous                                             | Disease defining | PO4 disorders                                            | 194            | >=0.05             | >5            | >=0.1       |
| Serum Potassium                                               | Disease defining | Hyperpotassemia, Hypopotassemia                          | 545            | >=0.05             | >5            | >=0.1       |
| Serum triglycerides (Tg)                                      | Disease defining | Hyperglyceridemia                                        | 1              | <0.05              | <=05          | <0.05       |
| Smoking                                                       | Disease defining | Tobacco user                                             | 1              | <0.05              | <=05          | <0.05       |
| Systolic blood pressure (SBP)                                 | Disease defining | Essential hypertension                                   | 2              | <0.05              | <=05          | <0.05       |
| Total cholesterol                                             | Disease defining | Hypercholesterolemia                                     | 1              | <0.05              | <=05          | <0.05       |
| Total protein                                                 | Disease defining | Plasma protein metabolism d/o                            | 940            | >=0.05             | >5            | >=0.1       |
| Type 2 diabetes (T2D)                                         | Disease defining | T2D                                                      | 1              | <0.05              | <=05          | <0.05       |
| White blood cell count                                        | Disease defining | Diseases of WBC, Decreased WBC count, Elevated WBC count | 1              | >=0.05             | <=05          | <0.05       |

**Supplementary Table 3: Associations between select PheWAS diagnoses with a genetic predictor of LDL, stratified by T2D status.**

| <b>Group</b>         | <b>PheWAS code</b> | <b>PheWAS phenotype</b> | <b>Cases</b> | <b>Controls</b> | <b>OR</b> | <b>95% CI</b> | <b>p-Value</b> |
|----------------------|--------------------|-------------------------|--------------|-----------------|-----------|---------------|----------------|
| All Subjects         | 38.3               | Bacteremia              | 1,966        | 30,062          | 0.91      | (0.87 - 0.95) | 2.7E-05        |
| Subjects with T2D    | 38.3               | Bacteremia              | 1,014        | 8,808           | 0.87      | (0.82 - 0.93) | 3.6E-05        |
| Subjects without T2D | 38.3               | Bacteremia              | 952          | 21,254          | 0.95      | (0.89 - 1.02) | 0.14           |
|                      |                    |                         |              |                 |           |               |                |
| All Subjects         | 38                 | Septicemia              | 3,844        | 30,062          | 0.93      | (0.90 - 0.96) | 4.6E-05        |
| Subjects with T2D    | 38                 | Septicemia              | 1,870        | 8,808           | 0.91      | (0.87 - 0.96) | 5.3E-04        |
| Subjects without T2D | 38                 | Septicemia              | 1,974        | 21,254          | 0.96      | (0.91 - 1.00) | 0.057          |

**Supplementary Table 4: Summary of associations between Low versus Normal LDL-C and either the Bacteremia or Septicemia PheWAS phenotypes. All associations are adjusted for age, gender and self-reported race.**

**Type 2 diabetics (n=1,392)**

| <b>Phenotype</b>  | <b>Cases</b> | <b>Controls</b> | <b>Odds-ratio</b> | <b>95% CI</b> | <b>p-value</b> |
|-------------------|--------------|-----------------|-------------------|---------------|----------------|
| <b>Septicemia</b> | 102          | 1,220           | 2.03              | (1.23 - 3.35) | 5.9E-03        |
| <b>Bacteremia</b> | 52           | 1,220           | 2.30              | (1.18 - 4.45) | 1.4E-02        |

**Non-diabetics (n=20,889)**

| <b>Phenotype</b>  | <b>Cases</b> | <b>Controls</b> | <b>Odds-ratio</b> | <b>95% CI</b> | <b>p-value</b> |
|-------------------|--------------|-----------------|-------------------|---------------|----------------|
| <b>Septicemia</b> | 369          | 19,987          | 3.76              | (2.93 - 4.79) | < 2E-16        |
| <b>Bacteremia</b> | 172          | 19,987          | 4.07              | (2.85 - 5.71) | 1.9E-15        |

**All subjects (n=22,281)**

| <b>Phenotype</b>  | <b>Cases</b> | <b>Controls</b> | <b>Odds-ratio</b> | <b>95% CI</b> | <b>p-value</b> |
|-------------------|--------------|-----------------|-------------------|---------------|----------------|
| <b>Septicemia</b> | 471          | 21,207          | 3.54              | (2.81 - 4.46) | < 2E-16        |
| <b>Bacteremia</b> | 224          | 21,207          | 3.60              | (2.65 - 4.90) | < 2E-16        |

**Supplementary Table 5: Characteristics of the EHR populations.**

| <b>Characteristic</b>              | <b>European ancestry<br/>primary analyses<br/>(n=37,153)</b> | <b>Feasibility study<br/>in self-reported<br/>blacks (n=8,552)</b> |
|------------------------------------|--------------------------------------------------------------|--------------------------------------------------------------------|
| <b>Sex [n (%)]</b>                 |                                                              |                                                                    |
| Males                              | 19,330 (52.0)                                                | 2,784 (32.6)                                                       |
| Females                            | 17,823 (48.0)                                                | 5,768 (67.4)                                                       |
|                                    |                                                              |                                                                    |
| <b>Birth Decade</b>                |                                                              |                                                                    |
| median (IQR)                       | 1945 (1935-1955)                                             | 1965 (1955-1985)                                                   |
|                                    |                                                              |                                                                    |
| <b>Contributing center [n (%)]</b> |                                                              |                                                                    |
| Marshfield                         | 3,707 (10.0)                                                 | n/a                                                                |
| VUMC                               | 20,230 (54.5)                                                | 3,506 (41.0)                                                       |
| Group Health                       | 2,358 (6.4)                                                  | 114 (1.3)                                                          |
| Mayo                               | 6,665 (17.9)                                                 | n/a                                                                |
| Northwestern                       | 1,247 (3.4)                                                  | 586 (6.9)                                                          |
| Geisinger                          | 2,946 (7.9)                                                  | n/a                                                                |
| Harvard                            | n/a                                                          | 249 (2.9)                                                          |
| Mt. Sinai                          | n/a                                                          | 3,757 (43.9)                                                       |
| CCHMC                              | n/a                                                          | 33 (0.4)                                                           |
| CHOP                               | n/a                                                          | 307 (3.6)                                                          |

**Supplementary Table 6: Genotyping platforms and counts for the EHR subjects.**

| <b>PlinkSet</b> | <b>Platform</b>                        | <b>Count</b> | <b>Percent</b> |
|-----------------|----------------------------------------|--------------|----------------|
| eMERGE I sites  | Human660W-Quadv1_A                     | 14,196       | 38.21          |
| Geisinger       | HumanOmniExpress-12v1.0                | 2,946        | 7.93           |
| MarshField      | Affymetrix6.0                          | 559          | 1.5            |
| Mayo            | IlluminaHuman-610 and -550             | 3,051        | 8.21           |
| VUMC            | MEGA-EX_Consortium_v2_15070954_A1_b138 | 6,171        | 16.61          |
| VUMC            | HumanOmniExpressExome-8v1.2A           | 4,960        | 13.35          |
| VUMC            | HumanOmni1-QUAD                        | 3,962        | 10.66          |
| VUMC            | HumanOmni5-QUAD                        | 1,308        | 3.52           |

**Supplementary Table 7: Characteristics of the LDL-C epidemiological cohort.**

| <b>Characteristic</b>           | <b>Low LDL Cohort<br/>(N=2,070)</b> | <b>Normal LDL<br/>Cohort<br/>(N=20,211)</b> |
|---------------------------------|-------------------------------------|---------------------------------------------|
| <b>Age (years) [mean, s.d.]</b> | 43.9 ± 17.5                         | 46.4 ± 15.5                                 |
|                                 |                                     |                                             |
| <b>Female</b>                   | 1,156 (55.8%)                       | 11,714 (58.0%)                              |
| <b>Male</b>                     | 912 (44.1%)                         | 8,476 (41.9%)                               |
| <b>Unknown</b>                  | 2 (0.1%)                            | 21 (0.1%)                                   |
|                                 |                                     |                                             |
| <b>Self-reported race:</b>      |                                     |                                             |
| <b>White</b>                    | 1,309 (63.2%)                       | 14,448 (71.5%)                              |
| <b>Black</b>                    | 386 (18.7%)                         | 2,352 (11.6%)                               |
| <b>Other</b>                    | 375 (18.1%)                         | 3,411 (16.9%)                               |
|                                 |                                     |                                             |
| <b>BMI</b>                      | 27.6 ± 7.4                          | 28.8 ± 6.9                                  |
